# Supplementary material
Source: PubMed Central journal article supplement (PMC2662153)
Supplement: M801401200_1.pdf [file M801401200_1.pdf]

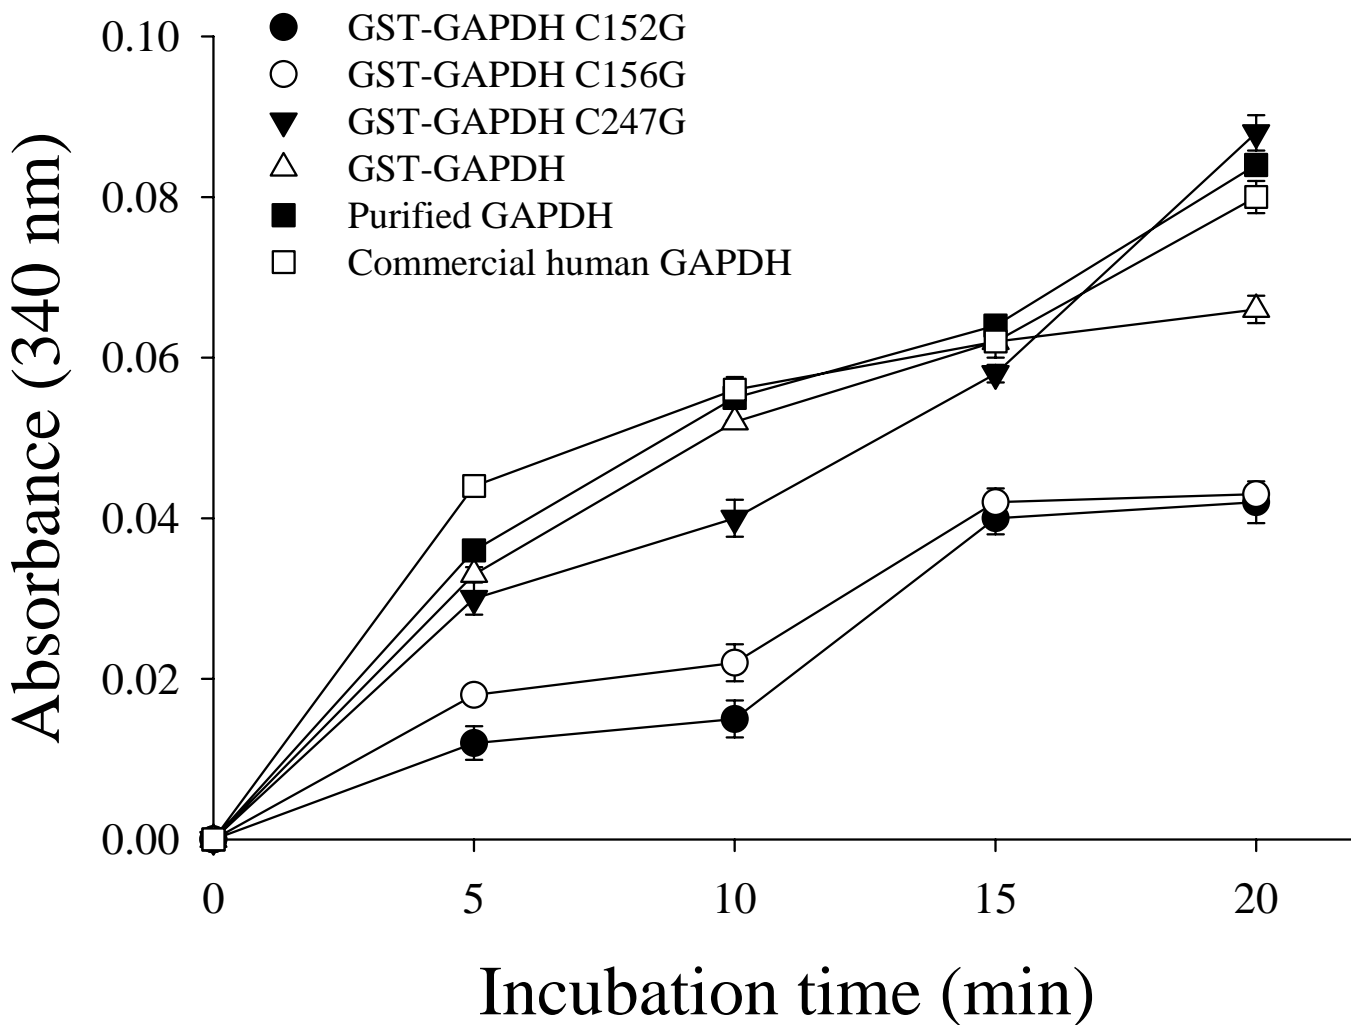

**Fig. S1: Analysis for GAPDH activity.** The glycolytic activity of commercial human GAPDH, purified recombinant human GAPDH (GST-GAPDH) and its variants; C152G, C156G and C247G was monitored by the formation of NADH at 340 nm. The reactions were performed at 25°C at the indicated times.

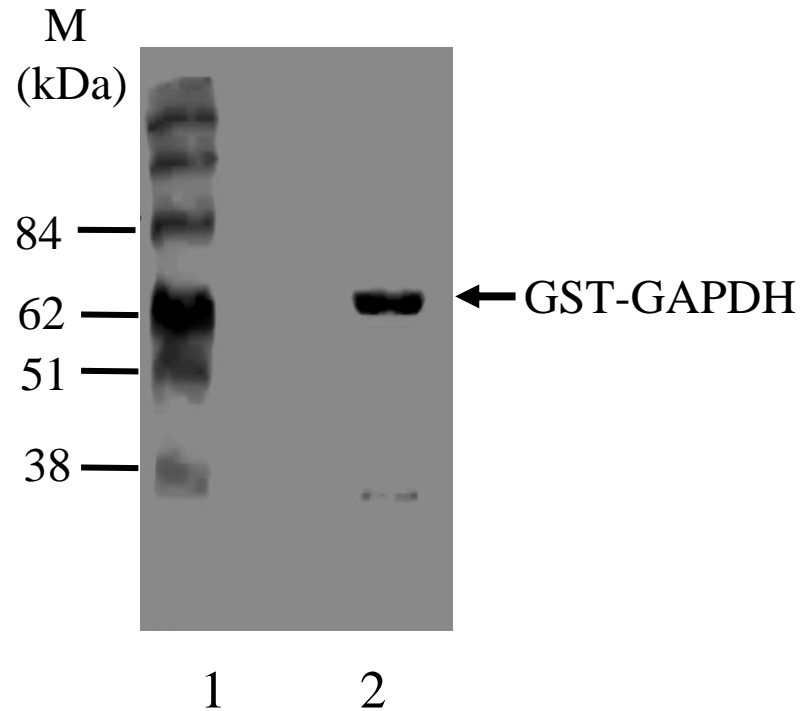

**Fig. S2: Expression of recombinant human GAPDH as GST fusion.** GST-GAPDH present in total extracts derived from strain BW528 carrying the plasmid pGST-GAPDH was purified on a GST affinity column and analyzed on a SDS-PAGE gel stained with Coomassie blue. Lane 2 contained 200 ng of the affinity-purified recombinant GST-GAPDH fusion protein. Lane 1, molecular weight standards (kDa).

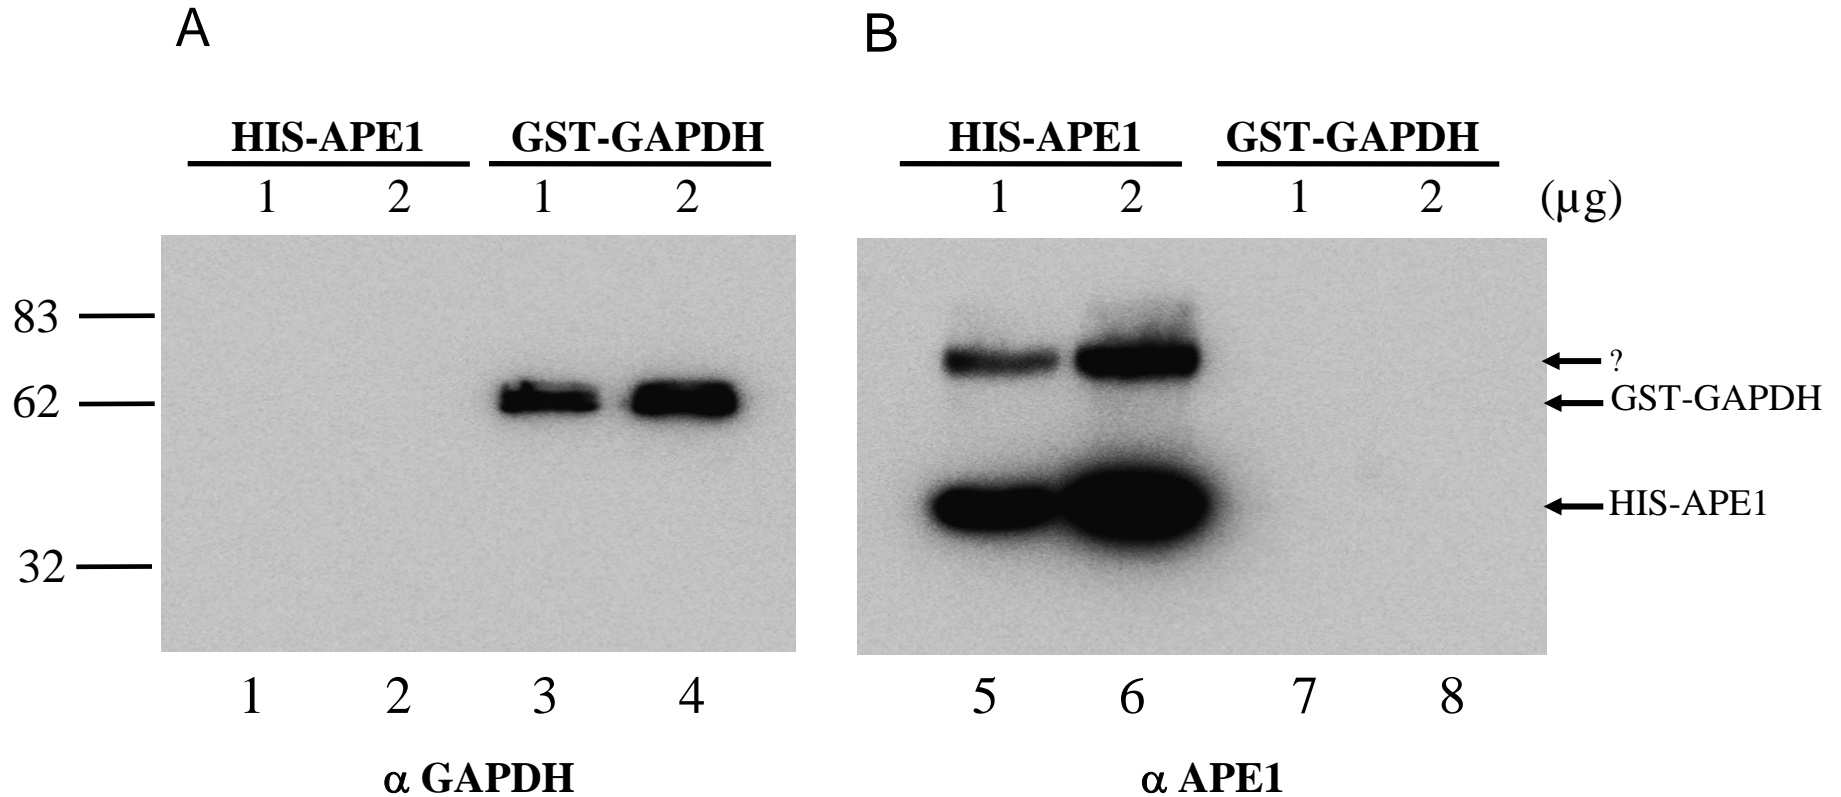

**Fig. S3: No cross-reactivity of anti-GAPDH towards APE1 and vice versa.** (A) and (B) are duplicated blots with the indicated amounts of purified HIS-APE1 (lanes 1, 2, 5 and 6) and purified GST-GAPDH (lanes 3, 4, 7 and 8), which were probed with anti-GAPDH and anti-APE1, respectively. The upper arrow indicated by ? in (B) is a possible dimeric form of HIS-APE1.

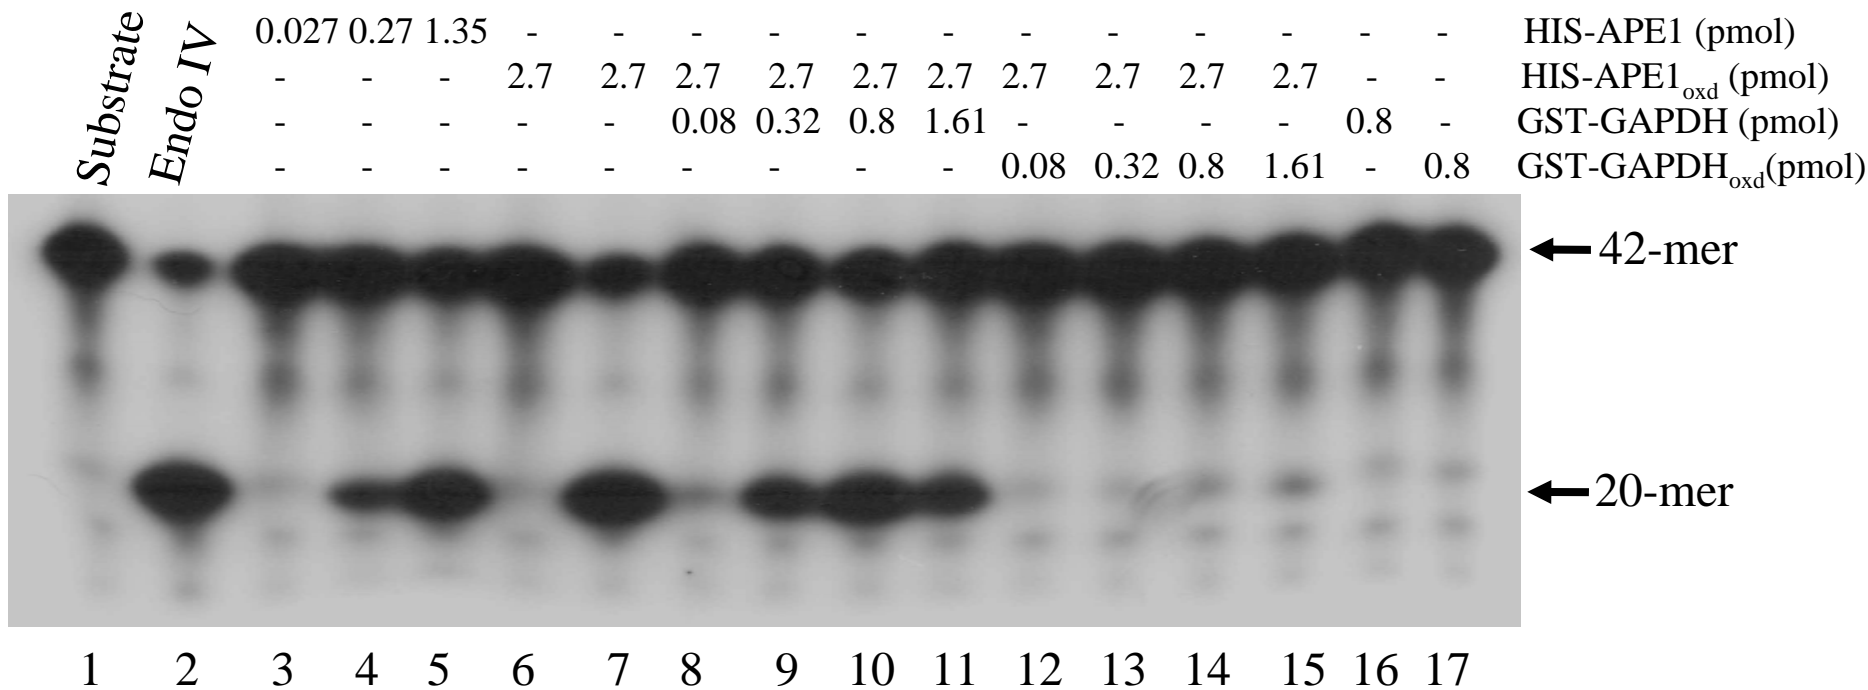

**Fig. S4: H<sub>2</sub>O<sub>2</sub>-inactivated GAPDH is unable to reactivate oxidized APE1.** The reactivation of oxidized APE1 was analyzed by AP endonuclease assay in the presence of either reduced (lanes 8-11) or oxidized (lanes 12-15) GAPDH. Both oxidized APE1 and GAPDH were prepared by chemical treatment with H<sub>2</sub>O<sub>2</sub>.

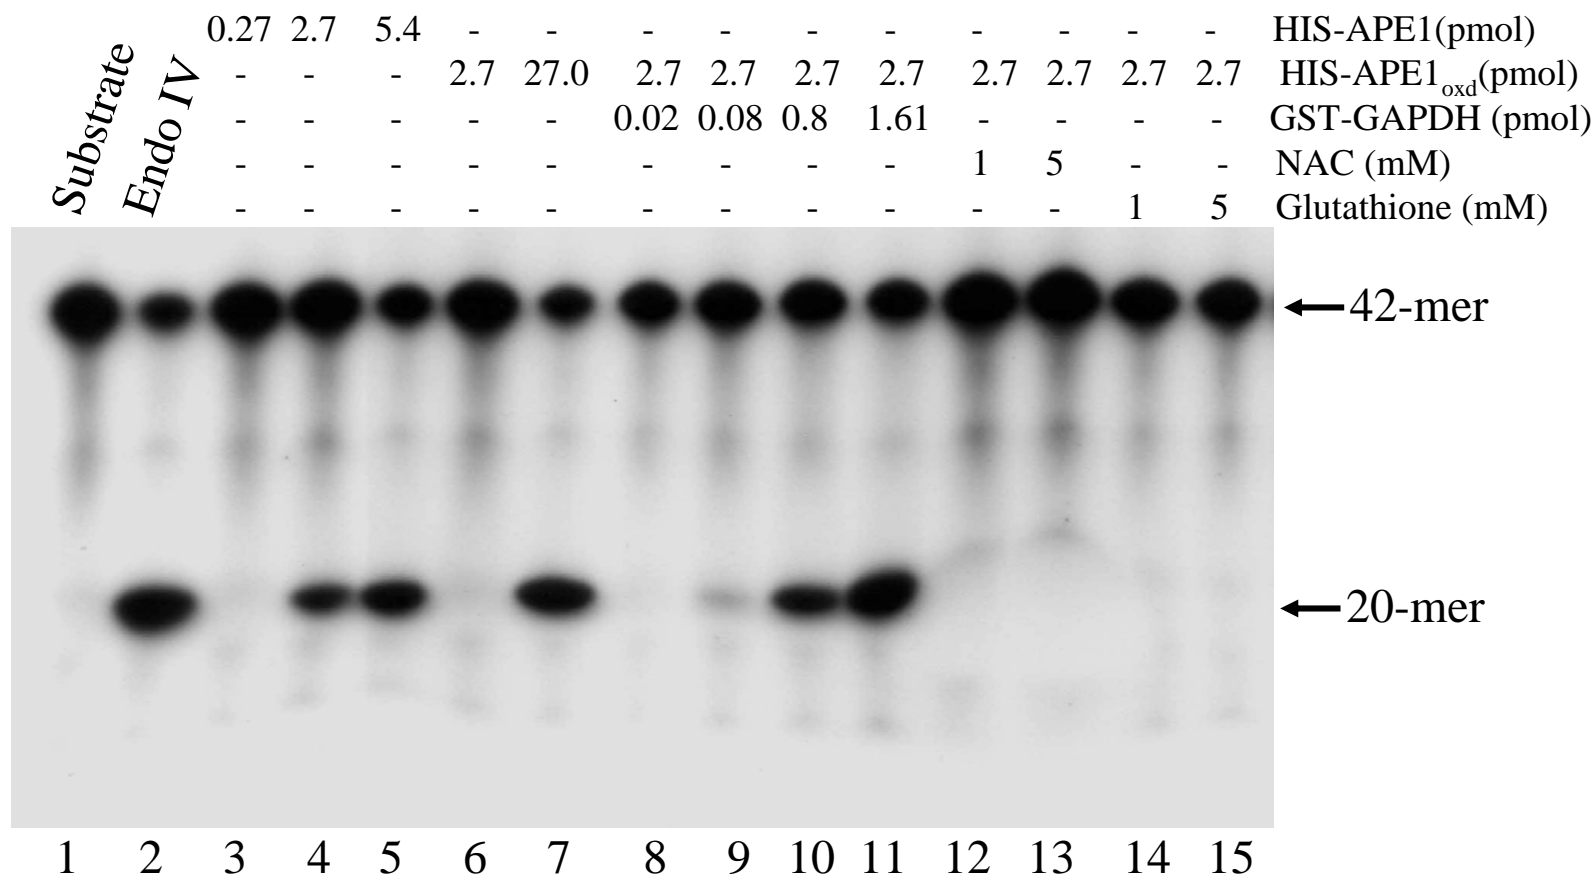

**Fig. S5: GAPDH, but not NAC or glutathione, reactivates the AP endonuclease activity of oxidized APE1.** Fixed amount of HIS-APE1<sub>oxd</sub> was incubated with the indicated concentrations of either NAC (lanes 12 and 13) or glutathione (lanes 14 and 15) for 5 min at RT and assayed for AP endonuclease activity. Controls (lanes 1-7) are as in panel A, lanes 8-11, fixed amount of HIS-APE1<sub>oxd</sub> incubated with increasing concentrations of purified GST-GAPDH.

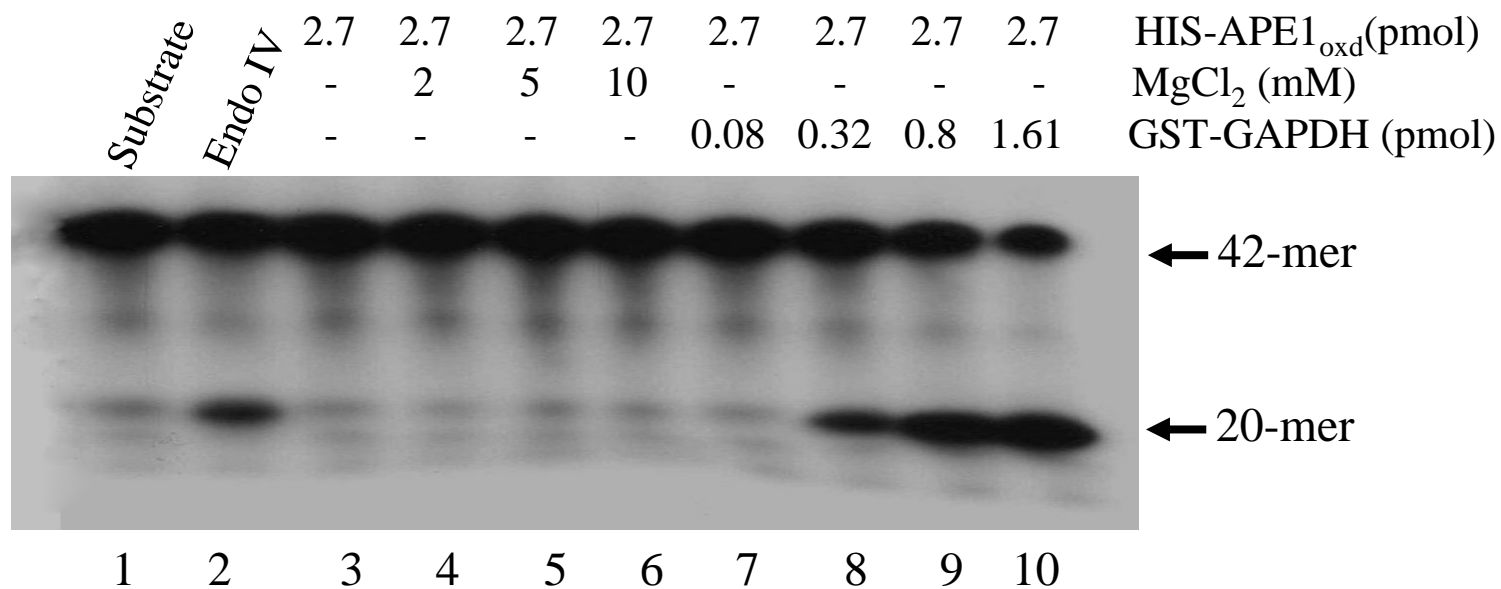

**Fig. S6: Oxidized APE1 is not reactivated by Mg<sup>2+</sup>.** HIS-APE1 was subjected to H<sub>2</sub>O<sub>2</sub>-oxidation and the enzyme activity was analyzed by AP endonuclease assay in the presence of increasing concentrations of either MgCl<sub>2</sub> (lanes 4-6) or GST-GAPDH (7-10).

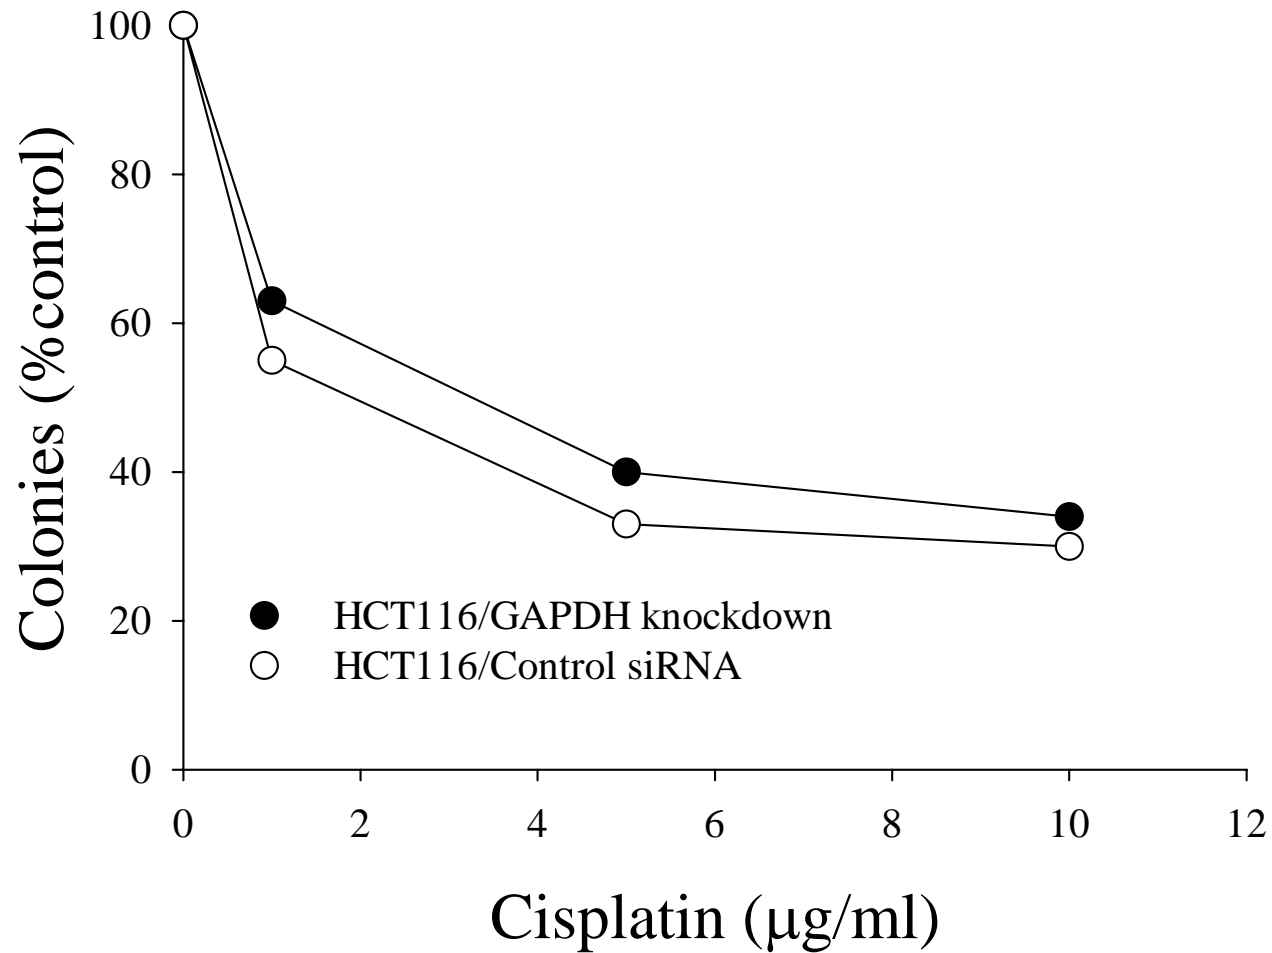

**Fig. S7: GAPDH knockdown cells are not sensitive to cisplatin.** Cells were treated for 1 hr with cisplatin in FBS free media and then plated to score for the surviving fractions by colony assay.
